# Supplementary material for: Flexible hydrogels connecting adhesion and wetting
Source: Royal Society of Chemistry journal article supplement (doi:10.1039/d4sm00022f), 2024-01-01
Supplement: d4sm00022f1.pdf [file d4sm00022f1.pdf]

Supplementary Information

## Flexible hydrogels connecting adhesion and wetting

A-Reum Kim<sup>a,1</sup>, Surjyasish Mitra<sup>a,2</sup>, Sudip Shyam<sup>2</sup>, Boxin Zhao<sup>1\*</sup> and Sushanta K. Mitra<sup>2\*</sup>

<sup>1</sup> Department of Chemical Engineering, Waterloo Institute for Nanotechnology,  
University of Waterloo, Waterloo, Ontario, N2L 3G1, Canada.

<sup>2</sup> Department of Mechanical & Mechatronics Engineering, Waterloo Institute for Nanotechnology,  
University of Waterloo, Waterloo, Ontario, N2L 3G1, Canada.

\* To whom correspondence should be addressed. E-mail: [zhaob@uwaterloo.ca](mailto:zhaob@uwaterloo.ca) (Boxin Zhao) and [skmitra@uwaterloo.ca](mailto:skmitra@uwaterloo.ca) (Sushanta K. Mitra).

<sup>a</sup> These authors contributed equally.

**Table S1.**

Physical properties of Acrylamide (AAm) solvent for different monomer weight percentage.

| Monomer weight % | Surface tension, $\gamma$ (mN/m) | Density, $\rho$ (kg/m <sup>3</sup> ) |
|------------------|----------------------------------|--------------------------------------|
| 2.5              | 70.9±0.2                         | 999.7                                |
| 4.0              | 69.6±0.1                         | 1001.0                               |
| 6.3              | 65.7±0.1                         | 1003.1                               |
| 6.5              | 65.6±0.2                         | 1003.3                               |
| 7.0              | 65.6±0.1                         | 1003.8                               |
| 7.5              | 64.8±0.3                         | 1004.3                               |
| 10.0             | 64.2±0.2                         | 1006.8                               |
| 13.0             | 61.9±0.1                         | 1009.8                               |
| 20.0             | 60.6±0.2                         | 1013.3                               |
| 30.0             | 57.3±0.1                         | 1019.4                               |

**Table S2.**

Comparison of elasto-adhesive parameter between our study and certain existing literature

| Literature                                   | Top contacting pair                                                | Bottom contacting pair                        | $E^* R_0/w$            |
|----------------------------------------------|--------------------------------------------------------------------|-----------------------------------------------|------------------------|
| Rimai <i>et al.</i><br>J. Appl. Phys. (1989) | Polystyrene sphere (<br>$E_1 = 100 - 1000$ MPa)                    | Polyurethane rubber (<br>$E_2 = 5$ MPa)       | 5 – 205                |
| Rimai <i>et al.</i><br>Langmuir (1994)       | Glass sphere                                                       | Polyurethane rubber (<br>$E_2 = 45$ kPa)      | 5 – 67                 |
| Style <i>et al.</i><br>Nat. Commun. (2013)   | Glass sphere                                                       | Silicone gel<br>( $E_2 = 3 - 500$ kPa)        | 0.15 – 88              |
| Jensen <i>et al.</i><br>PNAS (2015)          | Glass sphere                                                       | Silicone gel<br>( $E_2 = 5.6$ kPa)            | 1.5 – 3.2              |
| Chakrabarti <i>et al.</i><br>Langmuir (2018) | Polyacrylamide<br>hydrogel sphere<br>( $E_1 = 180 - 2367$ kPa)     | Bare and silanized<br>silicon wafer           | 750 – $10^4$           |
| Present work                                 | Hydrogel sphere (<br>$E_1 = 0.0057 - 106.65$<br>kPa), glass sphere | PDMS ( $E_2 = 3 - 6855$<br>kPa), glass slides | $0.05 - 2 \times 10^5$ |

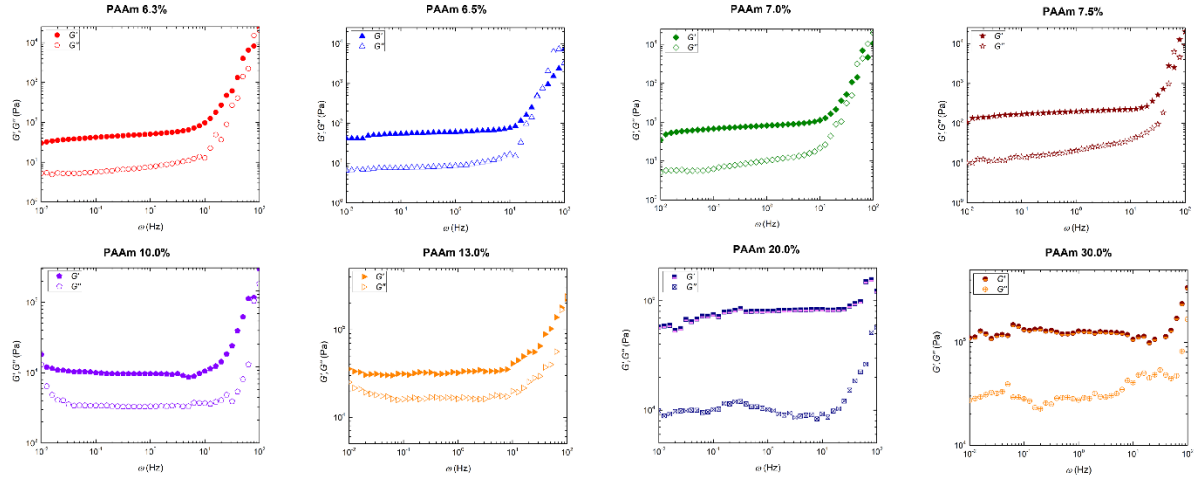

**Figure S1. Rheology of hydrogels.** Variation of storage modulus ( $G'$ ) and loss modulus ( $G''$ ) with angular frequency  $\omega$  for hydrogels with different monomer weight percentages. The static shear modulus  $G$  is calculated using  $G = \sqrt{G'^2 + G''^2}$  at  $\omega = 1$  Hz.

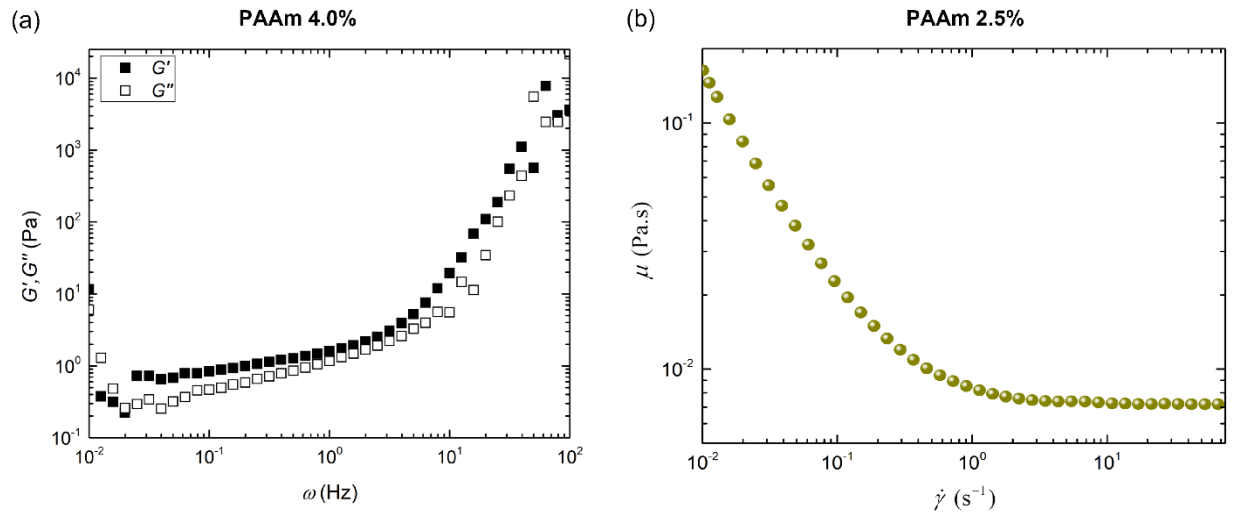

**Figure S2. Rheology of hydrogels.** (a) Variation of storage modulus ( $G'$ ) and loss modulus ( $G''$ ) with angular frequency  $\omega$  for PAAm 13.0%, i.e., hydrogel with 13.0% monomer weight percentage. The static shear modulus  $G$  is calculated using  $G = \sqrt{G'^2 + G''^2}$  at  $\omega = 1$  Hz. (b) Variation of shear viscosity  $\mu$  with shear rate  $\dot{\gamma}$  for the liquid hydrogel, i.e., hydrogel with 2.5% monomer weight percentage.

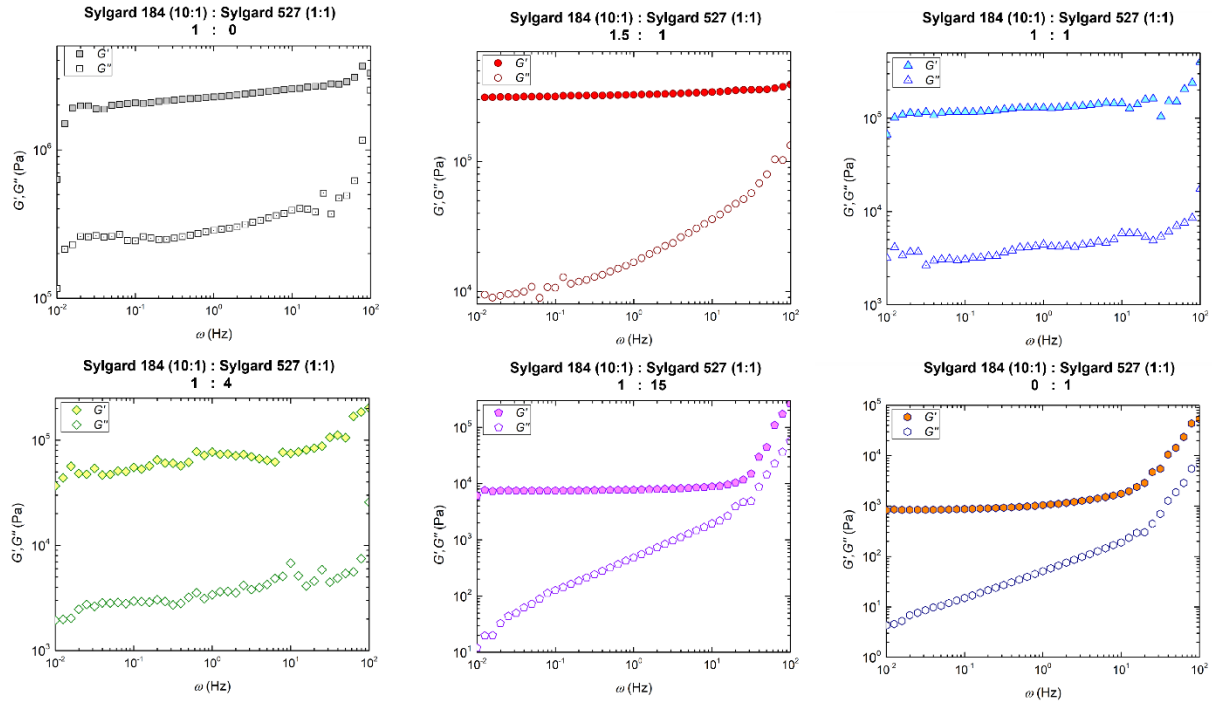

**Figure S3. Rheology of soft substrates.** Variation of storage modulus ( $G'$ ) and loss modulus ( $G''$ ) with angular frequency  $\omega$  for substrates prepared combining Sylgard 184 PDMS (10:1) and Sylgard 527 (1:1) in different weight ratios. The static shear modulus  $G$  is calculated using  $G = \sqrt{G'^2 + G''^2}$  at  $\omega = 1$  Hz.

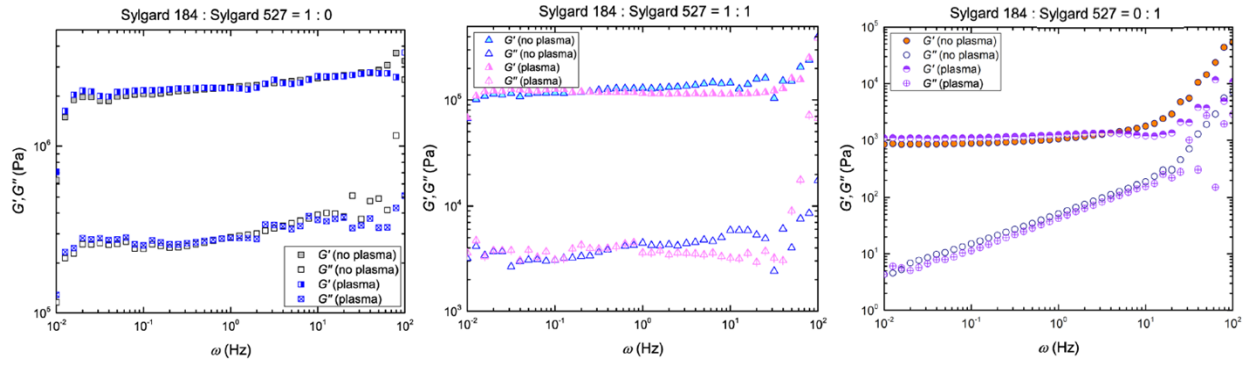

**Figure S4. Rheology of soft substrates with plasma treatment.** Variation of storage modulus ( $G'$ ) and loss modulus ( $G''$ ) with angular frequency  $\omega$  for substrates prepared combining Sylgard 184 PDMS (10:1) and Sylgard 527 (1:1) in different weight ratios for with and without plasma-treatment. The static shear modulus  $G$  is calculated using  $G = \sqrt{G'^2 + G''^2}$  at  $\omega = 1$  Hz.

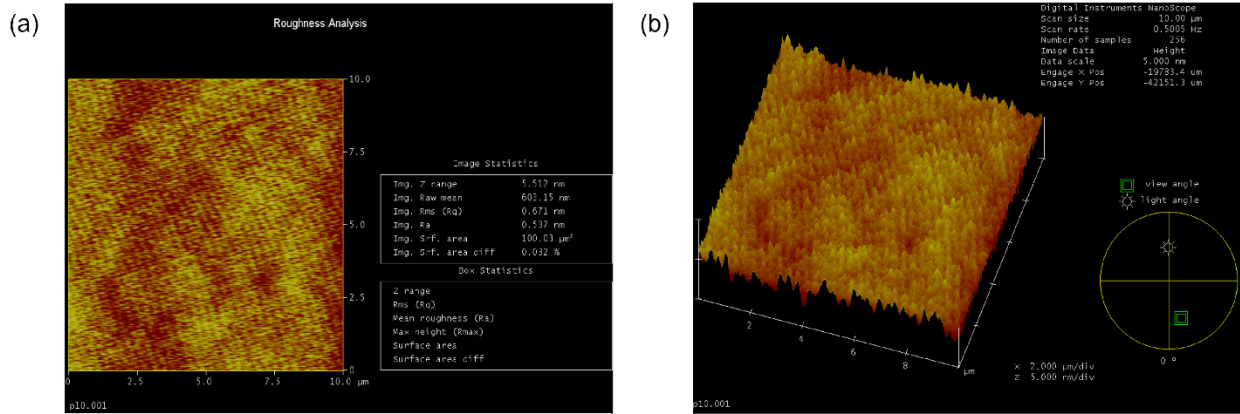

**Figure S5. AFM measurements.** (a) Atomic force microscopy (AFM) scan on a  $10\ \mu\text{m} \times 10\ \mu\text{m}$  cross-section of a plasma treated PDMS substrates with elastic modulus,  $E_2 = 6855\ \text{kPa}$ .  $R_q$  and  $R_a$  values for the scan are shown. (b) Three-dimensional profile of the scan shown in (a).

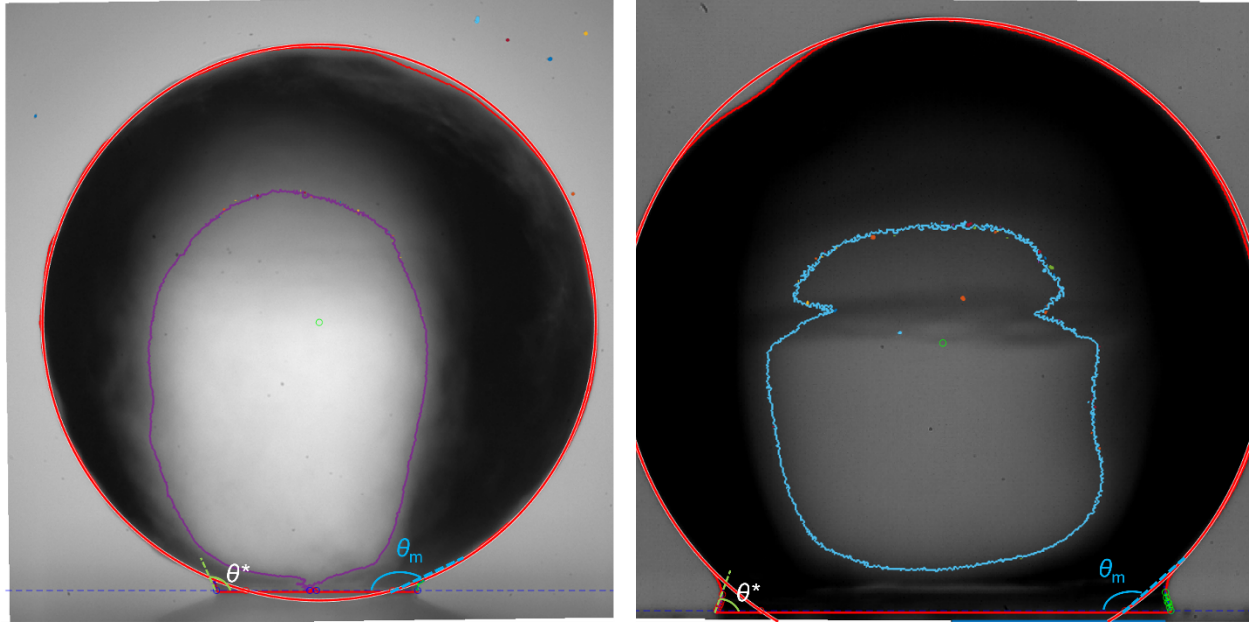

**Figure S6.** Experimental snapshots of hydrogels on surfaces highlighting the fitting procedure to extract the foot contact angle  $\theta^*$  and apparent macroscopic angle away from the foot  $\theta_m$ .



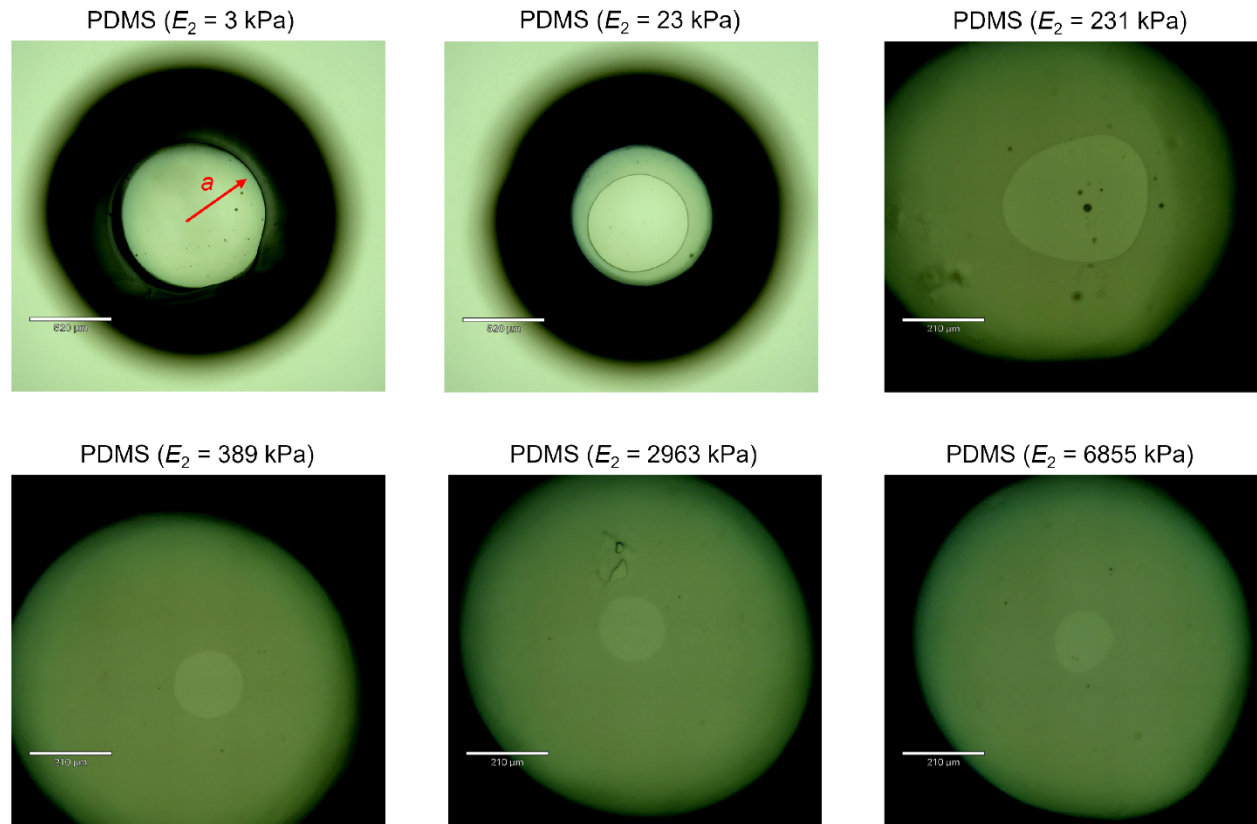

**Figure S7. Glass sphere on soft PDMS.** Bottom-view bright-field microscopy images of 1mm radius rigid glass spheres in contact with soft PDMS substrates for varying elasticity ( $E_2$ ).  $a$  denotes the contact radius. Note the different scale bars.

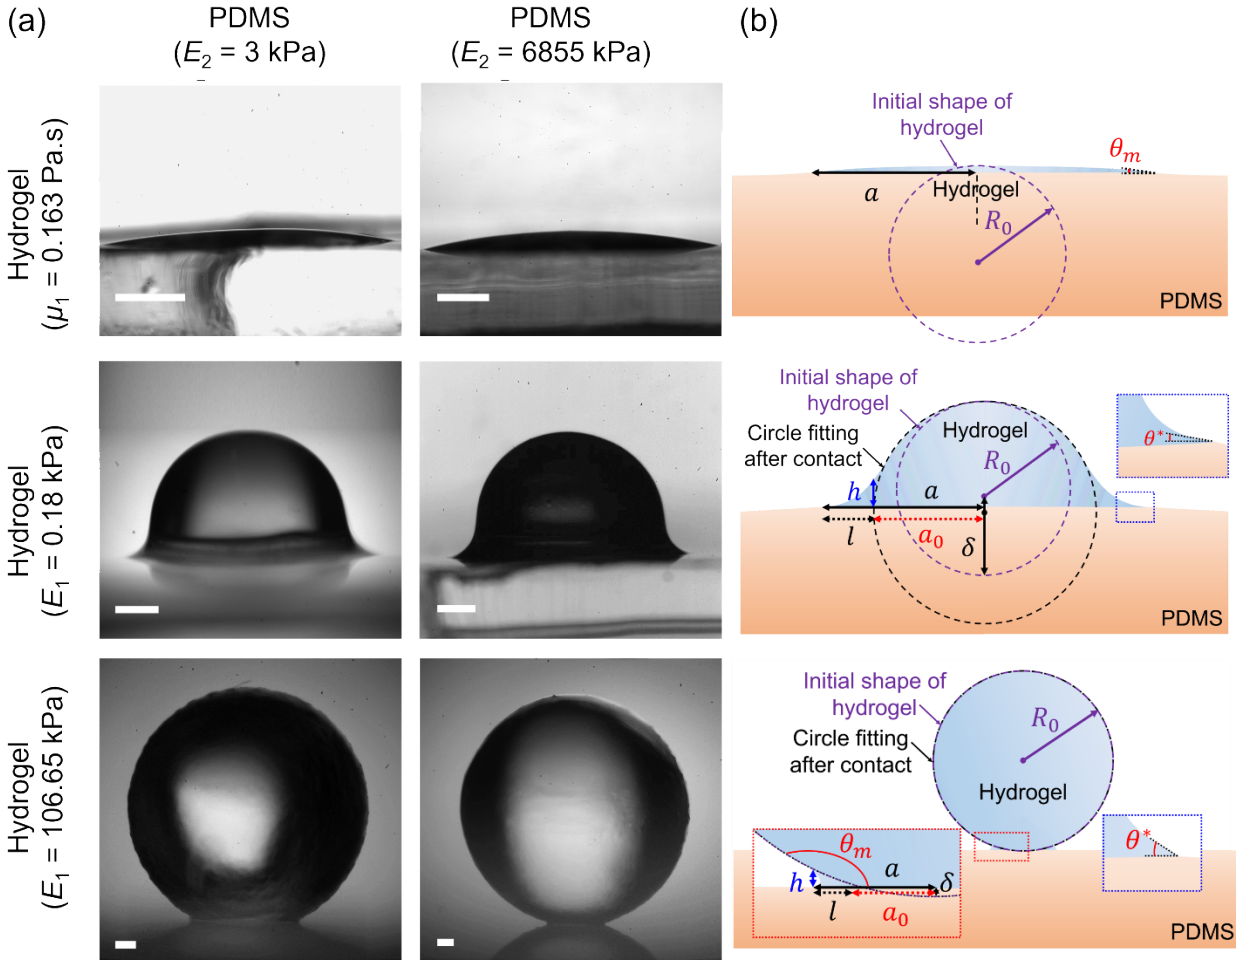

**Figure S8.** (a) Experimental snapshots of the static configuration of different hydrogels on plasma-treated soft substrates with elasticity  $E_2 = 3$  kPa and  $E_2 = 6855$  kPa. Scale bars represent 0.5 mm. (b) Schematics of the different possible hydrogel profiles of initial radius  $R_0$  on the soft substrates.  $\theta_m$  and  $\theta^*$  are the macroscopic and foot contact angles, respectively.  $a$  and  $a_0$  are the real and apparent contact radius, respectively.  $\delta$  is the apparent indentation depth.  $h$  and  $l$  are the foot height and length, respectively.

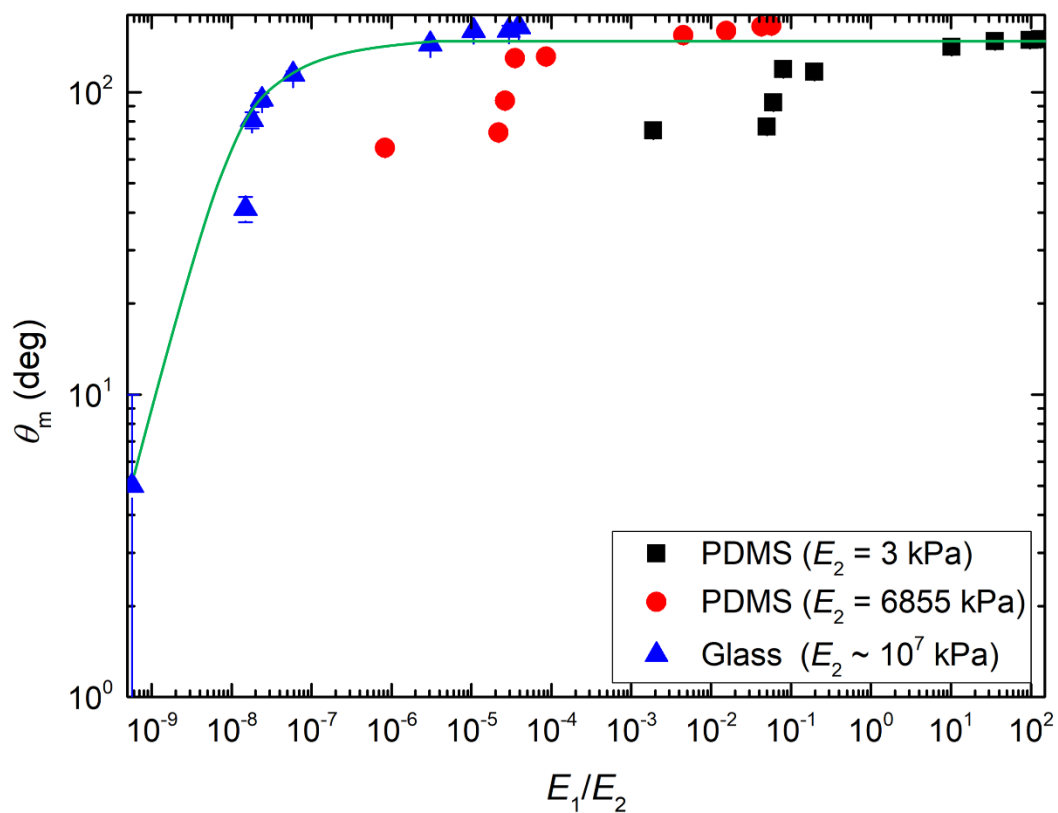

**Figure S9:** Variation of macroscopic contact angle  $\theta_m$  with the elasticity ratio of the top (hydrogel,  $E_1$ ) and bottom (PDMS, glass,  $E_2$ ) pair  $E_1/E_2$ . The solid curve is a guide for the eye.

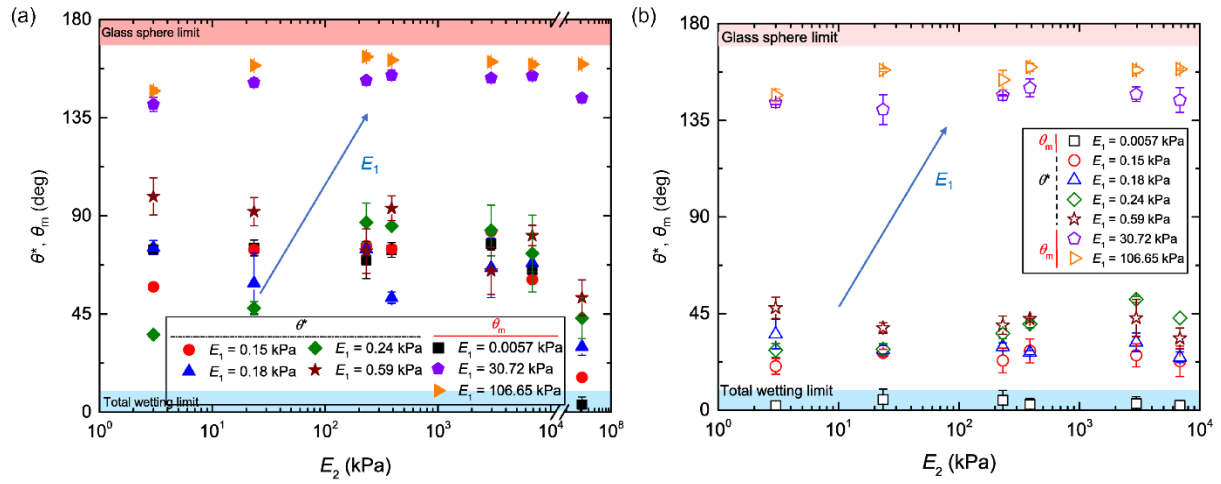

**Figure S10. Hydrogel contact angles.** Variation of contact angles ( $\theta_m, \theta^*$ ) of hydrogels of varying elasticity ( $E_1$ ) on pristine (a) and plasma treated (b), soft PDMS substrates of varying elasticity ( $E_2$ ).

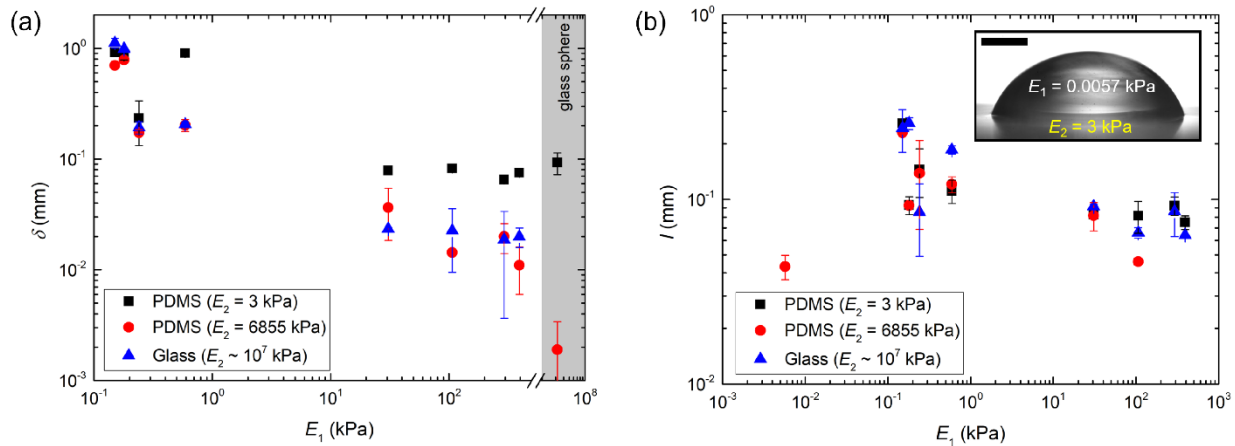

**Figure S11. Variation of hydrogel contact radius (a), foot-height (b) for different hydrogel elasticity ( $E_1$ ) on relatively soft PDMS ( $E_2 = 3$  kPa), relatively stiff PDMS ( $E_2 = 6855$  kPa) and rigid glass slides ( $E_2 \approx 10^7$  kPa). The data for rigid glass sphere is also shown for (a). The hydrogel with the lowest elasticity, i.e.,  $E_1 = 0.0057$  kPa exhibits no foot on the softest PDMS substrate, i.e.,  $E_2 = 3$  kPa (inset of (b)). The radius of hydrogel is  $R_0 \approx 1$  mm. All soft substrates are 2 mm thick.**

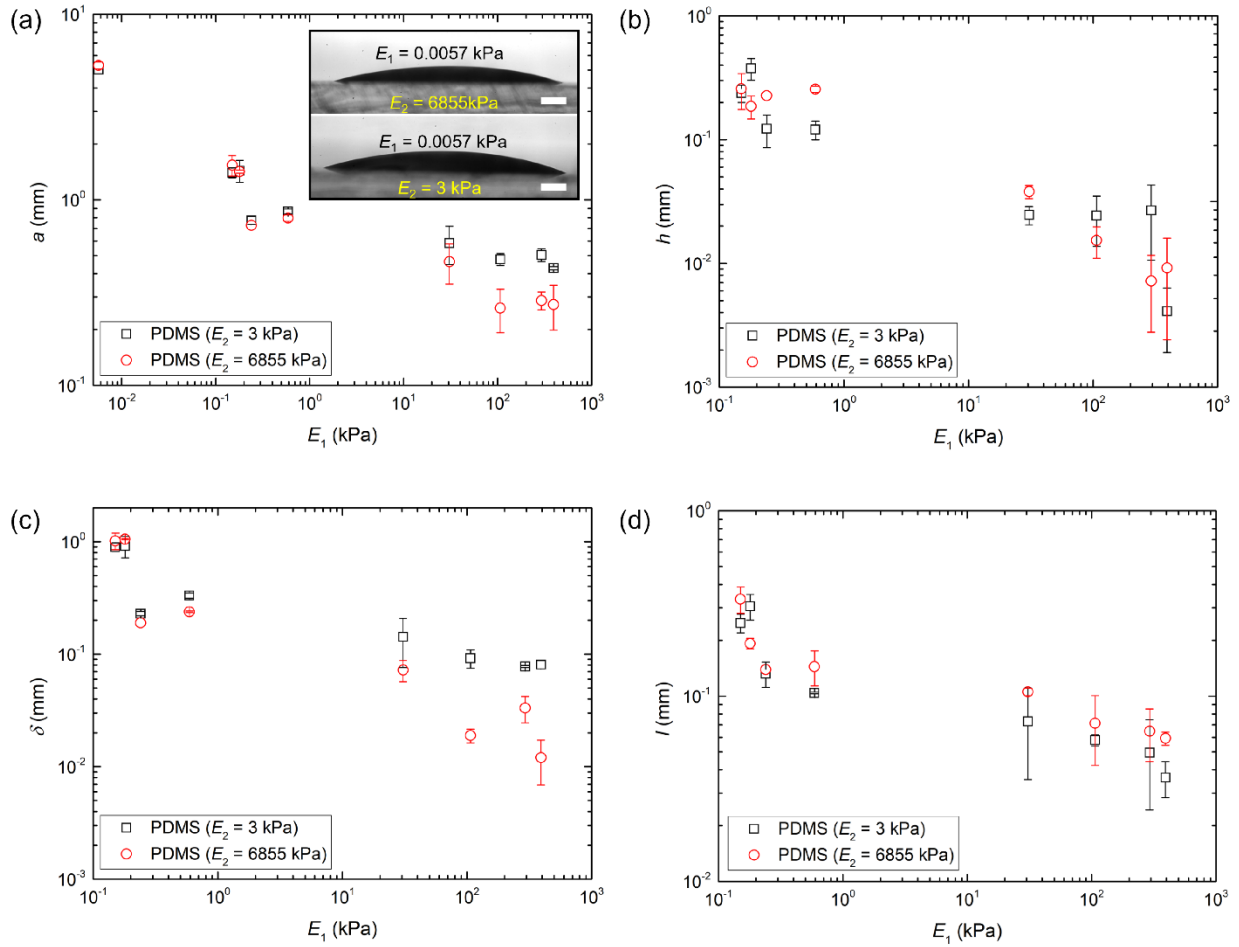

**Figure S12. Hydrogels on plasma treated PDMS.** Variation of hydrogel contact radius (a), foot- height (b), apparent indentation depth (c) and foot-length (d) for different hydrogel elasticity ( $E_1$ ) on relatively soft PDMS ( $E_2 = 3$  kPa) and relatively stiff PDMS ( $E_2 = 6855$  kPa). The hydrogel with the lowest elasticity, i.e.,  $E_1 = 0.0057$  kPa exhibits no foot on either of the plasma treated PDMS substrates (inset of (b)). The radius of hydrogel is  $R_0 \approx 1$  mm. All soft substrates are 2 mm thick.

## S1.1 Adhesion measurements

For measuring the work of adhesion between hydrogel and PDMS, we used a cantilever-based force probe [1]. A polymeric capillary tube of diameter  $410 \mu\text{m}$  and spring constant,  $k = 305 \pm 6.1 \text{ nN}/\mu\text{m}$  is used as the cantilever probe. A hydrogel sphere/droplet was attached to the tip of the probe and the PDMS substrate (affixed to a linear actuator) was made to approach the probe at a prescribed velocity of  $0.1 \text{ mm/s}$ . Once contact was established, there was a hold time of 10-20 s after which the PDMS substrate was made to retract. The adhesion induced interaction between PDMS, and the hydrogel probe caused deflection  $x$  of the cantilever. Consequently, the maximum deflection  $\Delta x$  was measured, and the corresponding peak adhesion force was calculated using,  $F = k\Delta x$  (Fig. S13). The work of adhesion is calculated using the relation for critical pull-off force:  $F_{cJKR} \approx 3\pi R_0 w/2$  [2,3] However, for the present case of different hydrogel contacts, we have added contributions to the above expression. The first added contribution comes from the capillary force from the hydrogel foot [4],  $F_f \approx 2\pi R_0 \gamma (\cos\theta_L^* + \cos\theta_R^*) \approx 4\pi R_0 \gamma \cos\theta^*$ , where  $\theta_L^*$  and  $\theta_R^*$  are the foot contact angles. The second contribution comes from the capillary force from the spherical cap profile [5],  $F_c \approx \pi \gamma (a^2 + b^2)/b$ , where  $b$  is the vertical height of the hydrogel. Thus, the critical force becomes,  $F \approx 4\pi R_0 \gamma \cos\theta^* + \pi \gamma (a^2 + b^2)/b + 3\pi R_0 w/2$ . For example, for the experiment shown in Fig. S13, we obtain the peak (pull-off) force  $F = 1.6 \text{ mN}$ . Consequently, using  $\gamma = 61.9 \text{ mN/m}$ ,  $a \approx 0.48 \text{ mm}$ ,  $b \approx 1.97 \text{ mm}$ ,  $R_0 \approx 1 \text{ mm}$ , and  $\theta^* \approx 50^\circ$ , we calculate  $w \approx 128 \text{ mN/m}$ . Incidentally, the calculated adhesion force is close to that obtained using  $w \approx 2\gamma$ , an assumption extensively used in existing literature [4,6,7]. At the same time, the present observation indicates a few things. First, if the rationale of  $w \sim (1+\cos\theta)\gamma$  is used for adhesion calculation, using  $\theta_m$  would lead to reduced  $w$  for the stiffer hydrogels. Consequently, the data points in Fig. 7 of the main manuscript would shift to the right and fall beyond the JKR predictions. Thus, it is more likely that the microscopic foot contact angle  $\theta^*$  plays a role in dictating  $w$ . Since high accuracy in measuring  $\theta^*$  is currently not possible, the authors hypothesize that the foot curvature becomes highly acute in meeting the substrate and may achieve a value close to 0 which makes  $w \sim 2\gamma$  appropriate for most of the hydrogels.

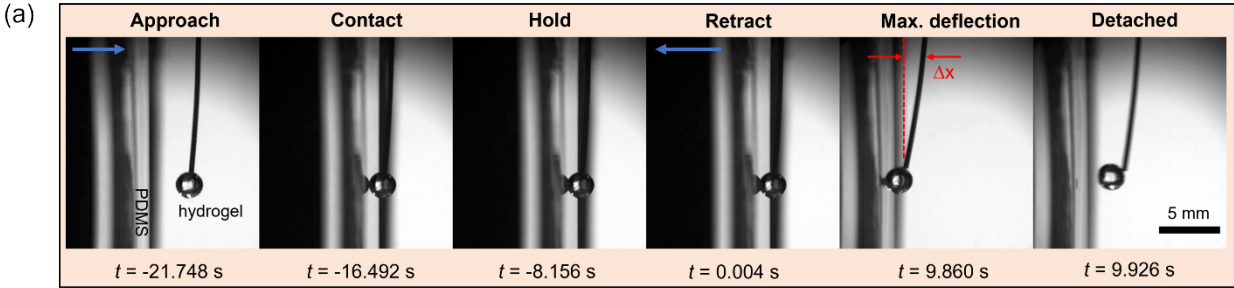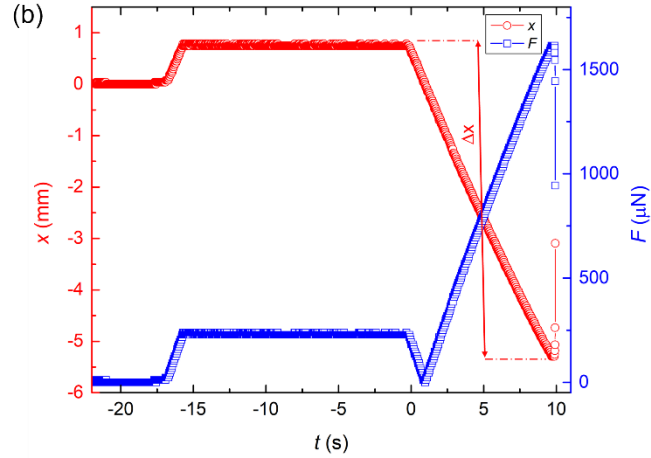

**Figure S13. Cantilever-based force measurements.** (a) Experimental snapshots of the cantilever-based contact force/adhesion measurements for a 1 mm radius hydrogel ( $E_1 = 106.65$  kPa) with soft PDMS substrate ( $E_2 = 3$  kPa). The different stages of force measurements: approach of the substrate, contact, hold, retraction of the substrate, maximum deflection of the cantilever and detachment are shown.  $t \approx 0$  represents the onset of substrate retraction. Scale bars represent 5 mm. (b) Evolution of cantilever deflection  $x$  (measured) and force  $F$  (extracted) for the experiment shown in (a).  $\Delta x$  represents the maximum cantilever deflection. The blue arrows represent the direction of substrate motion.



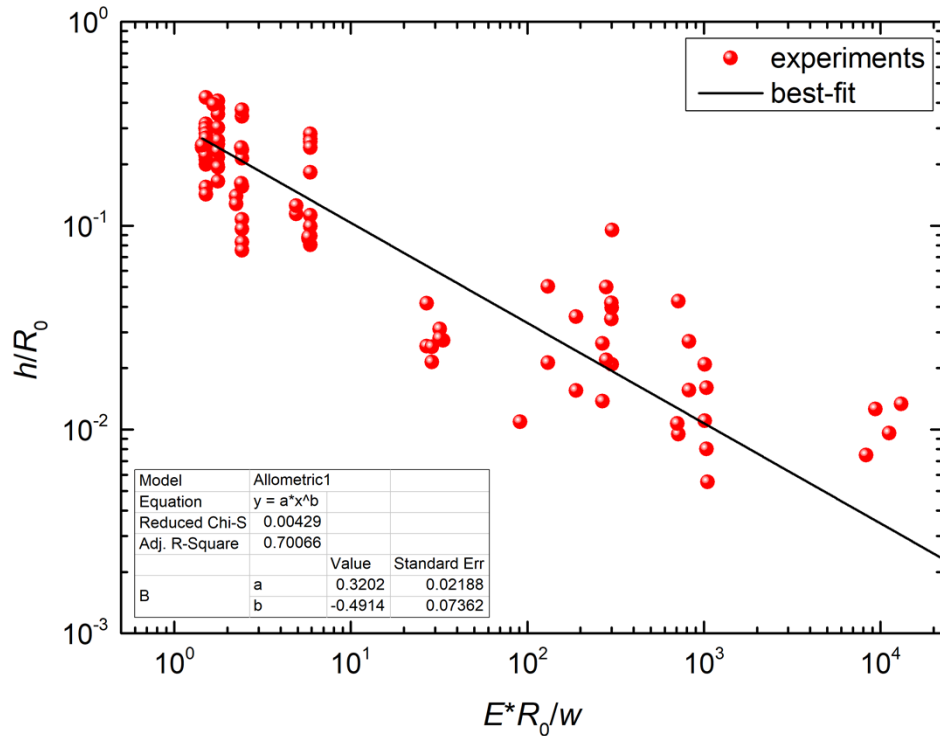

**Figure S14:** Variation of normalized foot height  $h/R_0$  with the elasto-adhesive parameter  $E^*R_0/w$  for all the hydrogels on the different soft substrates shown in Fig. 8b of the main manuscript. The solid line represents the power-law best fit with an exponent of -0.49.

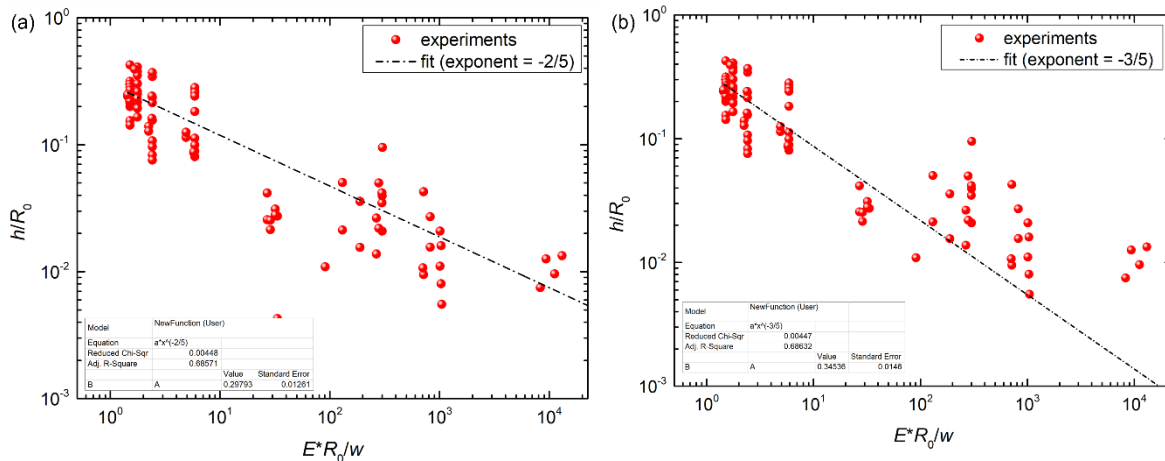

**Figure S15:** Variation of normalized foot height  $h/R_0$  with the elasto-adhesive parameter  $E^*R_0/w$  for all the hydrogels on the different soft substrates shown in Fig. 8b of the main manuscript. The dotted lines represent the power-law fit with an exponent of (a) -0.4 and (b) -0.6.

### S1.2 Detailed derivation of the relation between strain and elasto adhesive parameter (Eq.2 of the manuscript)

As highlighted in the main manuscript, for the small-to-large deformations present for the contact/wetting system of hydrogels on all the surfaces used, the appropriate elastic energy  $U_{el}$  can be expressed as [5,8,9]:

$$U_{el} \sim E^* R_0^3 \int_0^{a/R_0} \left[ \frac{1}{2} - \frac{(1+x'^2)}{4x'} \ln \left( \frac{1+x'}{1-x'} \right) \right]^2 dx' \quad (S1)$$

where,  $E^* = [(1 - \nu_1^2)/E_1 + (1 - \nu_2^2)/E_2]^{-1}$ . Here,  $E_1, \nu_1$  and  $E_2, \nu_2$ , elastic moduli and Poisson's ratios of the top (hydrogel) and bottom (glass, PDMS) pair, respectively.  $R_0$  is the hydrogel radius,  $a$  is the contact radius, and  $x' = a/R_0$  is the normalized contact radius or strain. Consequently, using the approximation,  $\ln [(1+x')/(1-x')] \approx 2 \tanh^{-1} x'$  we can express the elastic energy as,

$$U_{el} \approx E^* R_0^3 \int_0^{a/R_0} \left[ \frac{1}{2} - \frac{(1+x'^2)}{4x'} 2 \tanh^{-1} x' \right]^2 dx' \quad (S2)$$

Consequently, using the approximation,  $2 \tanh^{-1} x' \approx 2 \left( x' + \frac{x'^3}{3} \right)$ , we can express  $U_{el}$  as,

$$U_{el} \approx E^* R_0^3 \int_0^{a/R_0} \left[ \frac{1}{2} - \frac{(1+x'^2)}{2x'} \left( x' + \frac{x'^3}{3} \right) \right]^2 dx' \quad (S3)$$

Upon evaluating all the algebraic terms within the third bracket, we arrive at

$$U_{el} \approx E^* R_0^3 \int_0^{a/R_0} \frac{1}{4} \left[ -\frac{x'^4}{3} - \frac{4x'^2}{3} \right]^2 dx' \quad (S4)$$

Upon evaluating the squared term, we arrive at the final form of the integral,

$$U_{el} \approx E^* R_0^3 \int_0^{a/R_0} \frac{1}{36} (x'^8 + 8x'^6 + 16x'^4) dx' \quad (S5)$$

Consequently, evaluating the integral within the limit 0 and  $a/R_0$ , we obtain the final algebraic form of the elastic energy  $U_{el}$ ,

$$U_{el} \approx \frac{E^* R_0^3}{36} \left[ \frac{1}{9} \left( \frac{a}{R_0} \right)^9 + \frac{8}{7} \left( \frac{a}{R_0} \right)^7 + \frac{16}{5} \left( \frac{a}{R_0} \right)^5 \right] \quad (S6)$$

Therefore, the total energy can be expressed as,  $U = U_{el} + U_{ad} = U_{el} - \pi w a^2$ . Upon minimizing with respect to the contact radius  $a$ , i.e.,  $\frac{\partial U}{\partial a} = 0$ , we obtain

$$\frac{E^* R_0^2}{36} \left[ \left( \frac{a}{R_0} \right)^8 + 8 \left( \frac{a}{R_0} \right)^6 + 16 \left( \frac{a}{R_0} \right)^4 \right] - 2\pi w a = 0 \quad (S7)$$

Upon rearranging the terms, we obtain the final algebraic relation between strain  $a/R_0$  and the elasto- adhesive parameter  $E^* R_0/w$ :

$$\left[ \left( \frac{a}{R_0} \right)^7 + 8 \left( \frac{a}{R_0} \right)^5 + 16 \left( \frac{a}{R_0} \right)^3 \right] = \frac{72\pi w}{E^* R_0} \quad (S8)$$

Thus, we obtain Equation 2 in the main manuscript.

**References:**

- [1] S. Shyam, S. Misra, S. K. Mitra, *J. Colloid Interface Sci.* 2023, 630 322.
- [2] K. L. Johnson, K. Kendall, A. D. Roberts, *Proc. Royal Soc. Lon. A.* 1971, 324, 1558 301.
- [3] P. Prokopovich, V. Starov, *Adv. Colloid Interface Sci.* 2011, 168, 1-2 210.
- [4] H.-J. Butt, B. Cappella, M. Kappl, *Surf. Sci. Rep.* 2005, 59, 1-6 1.
- [5] T. Salez, M. Benzaquen, E. Raphael, *Soft Matter* 2013, 9, 45 10699.
- [6] K.-K. Liu, *J. Phys. D: Appl. Phys.* 2006, 39, 11 R189.
- [7] A.-R. Kim, S. K. Mitra, B. Zhao, *J. Colloid Interface Sci.* 2022, 628 788.
- [8] D. Maugis, *Langmuir*, 1995, 11, 679–682.
- [9] D. Maugis, D., M. Barquins, *J. Phys. D: Appl. Phys.*, 1983, 16(10), 1843.
